# Supplementary material
Source: Springer Nature journal article supplement (https://www.springermedizin.de/resource/supplementary/13058_2006_1640_MOESM2_ESM.pdf/9699584)
Supplement: MOESM2 [file 9699584]

| Table S2: TP53 mutations |          |       |                 |             |                   |                                 |
|--------------------------|----------|-------|-----------------|-------------|-------------------|---------------------------------|
| Patient identity         | Exon     | Codon | Codon change    | Base change | Amino acid change | Comments                        |
| ULL - 007                | 6        | 195   | ATC > ACC       | T > C       | ILE > THR         |                                 |
| ULL - 009                | 8        | 273   | CGT > TGT       | C > T       | ARG > CYS         |                                 |
| ULL - 023                | Intron 6 |       |                 | A > G       |                   | Intron 6 (upstream exon 7)      |
| ULL - 038                | 5        | 138   | GCC > GTC       | C > T       | ALA > VAL         | Additional mutation in intron 7 |
| ULL - 051                | 5        | 138   | GCC > GTC       | C > T       | ALA > VAL         |                                 |
| ULL - 055                | 8        | 273   | CGT > TGT       | C > T       | ARG > CYS         |                                 |
| ULL - 056                | 7        | 249   | AGG > ATG       | G > T       | ARG > MET         |                                 |
| ULL - 057                | 5        | 163   | TAC > TGC       | A > G       | TYR > CYS         |                                 |
| ULL - 065                | 8        | 273   | CGT > TGT       | C > T       | ARG > CYS         |                                 |
| ULL - 069                | 6        | 193   | CAT > CTT       | A > T       | HIS > LEU         |                                 |
| ULL - 071                | 8        | 273   | CGT > GGT       | C > G       | ARG > GLY         |                                 |
| ULL - 080                | 5        | 143   | GTG > ATG       | G > A       | VAL > MET         |                                 |
| ULL - 083                | 7        | 259   | GAC > TAC       | G > T       | ASP > TYR         |                                 |
| ULL - 090                | Intron 6 |       |                 | G > T       |                   | Intron 6 (downstream exon 6)    |
| ULL - 094                | 7        | 245   | GGC > AGC       | G > A       | GLY > SER         |                                 |
| ULL - 096                | 5        |       | 18 bp insertion |             |                   |                                 |
| ULL - 098                | 6        | 218   | GTG > ATG       | G > A       | VAL > MET         |                                 |
| ULL - 099                | 5        | 173   | GTG > CTG       | G > C       | VAL > LEU         |                                 |
| ULL - 101                | 8        | 273   | CGT > TGT       | C > T       | ARG > CYS         |                                 |
| ULL - 106                | 5        | 159   | GCC > GAC       | C > A       | ALA > ASP         |                                 |
| ULL - 113                | 4        | 113   | TTC > GTC       | T > G       | PHE > VAL         |                                 |
| ULL - 125                | 8        | 273   | CGT > CTT       | G > T       | ARG > LEU         |                                 |
| ULL - 131                | 10       | 342   | CGA > TGA       | C > T       | ARG > STOP        |                                 |
| ULL - 139                | 8        | 286   | 7 bp deletion   |             |                   |                                 |
| ULL - 142                | 11       | 393   | 4 bp deletion   |             |                   |                                 |
| ULL - 155                | 5        | 175   | CGC > CAC       | G > A       | ARG > HIS         |                                 |
| ULL - 167                | 7        | 251   | ATC > AGC       | T > G       | ILE > SER         |                                 |
| ULL - 171                | 5        | 175   | CGC > CAC       | G > A       | ARG > HIS         |                                 |
| ULL - 173                | 7        | 248   | CGG > TGG       | C > T       | ARG > TRP         |                                 |
| ULL - 177                | 4        | 110   | CGT > CCT       | G > C       | ARG > PRO         |                                 |
| ULL - 179                | 6        | 196   | 22 bp deletion  |             |                   |                                 |
| ULL - 188                | 6        | 216   | GTG > ATG       | G > A       | VAL > MET         |                                 |
| ULL - 198                | 5        | 179   | GTG > CTG       | G > C       | VAL > LEU         |                                 |
| ULL - 202                | 5        | 163   | TAC > CAC       | T > C       | TYR > HIS         |                                 |
| ULL - 209                | 8        | 282   | CGG > TGG       | C > T       | ARG > TRP         |                                 |
| ULL - 212                | 5        | 126   | TAC > GAC       | T > G       | TYR > ASP         |                                 |
| ULL - 215                | 8        | 278   | CCT > CTT       | C > T       | PRO > LEU         |                                 |
| ULL - 221                | 7        | 239   | AAC > AGC       | A > G       | ASN > SER         |                                 |
| ULL - 226                | 6        | 220   | TAT > TGT       | A > G       | TYR > CYS         |                                 |
| ULL - 238                | 7        | 244   | GGC > GAC       | G > A       | GLY > ASP         |                                 |
| ULL - 243                | 5        | 175   | CGC > CAC       | G > A       | ARG > HIS         |                                 |
| ULL - 244                | 4        | 38    | CAA > TAA       | C > T       | GLN > STOP        |                                 |
| ULL - 246                | 7        | 241   | TCC > TTC       | C > T       | SER > PHE         |                                 |
| ULL - 250                | 7        | 248   | CGG > CAG       | G > A       | ARG > GLN         |                                 |
| ULL - 263                | 4        | 89    | 11 bp insertion |             |                   |                                 |
| ULL - 267                | 9        | 321   | 1 bp deletion   | del A       |                   |                                 |
| ULL - 271                | 3        | 29    | 1 bp insertion  | ins A       |                   |                                 |
| ULL - 274                | 8        | 273   | CGT > CAT       | G > A       | ARG > HIS         |                                 |
